# Supplementary material
Source: Springer Nature journal article supplement (https://www.springermedizin.de/resource/supplementary/12884_2009_243_MOESM1_ESM.pdf/9459924)
Supplement: MOESM1 [file 9459924]

FSB=120

MSB=120

END=65

Total perinatal  
deaths  
n=305

BWT<1500 grams  
n=111

Eligible for  
analysis  
n=194

Cases with  
missing data  
n=61

Remained for  
analysis  
n=133
